# Supplementary material for: Potential groundwater contribution to Amazon evapotranspiration
Source: Copernicus journal article supplement (doi:10.5194/hess-14-2039-2010), 2010-10-25
Supplement: Supplementary file 1 [file hess-14-2039-2010-supplement.pdf]

# Supplementary Material for Potential Groundwater Contribution to Amazon Evapotranspiration

Ying Fan and Gonzalo Miguez-Macho

## Compiling Water Table Observations

We searched for water table observations over South America to examine the water table depth (WTD) and to validate model simulations. Observations are compiled from government archives and published literature. We searched the government database of each country in S. America and each province except for Brazil and Chile. Repeated emails were sent and phone calls were made where no data was found on the government website or the data is incomplete. Tens of articles are also found which reported the water table depth. Data are mostly presented as plots or maps, from which we read the approximate values. These observations are detailed below.

### Argentina

Groundwater information is collected by water companies associated with the provinces or municipalities in different ways and using different quality control standards. There is no centralized database at the national or provincial level. Email was sent to provinces requesting data (list: <http://www.hidricosargentina.gov.ar/sitios-organismos.html>) with no response. Further search of province websites yielded data from La Pampa, La Rioja, and Mendoza. In La Pampa, WTD time series exist at 73 wells (see <http://www.bdh.lapampa.gov.ar/lapampa/well/list.jsp>) with 7 showing water level changes over 200 m in a month, caused by pumping in confined aquifers and hence removed. For La Rioja, water levels at tens of wells are found (<http://www.larioja.gov.ar/sda/secundarias/perforaciones.html>) but well location is in descriptive terms such as “4 km al norte de Vinchina sobre banquina der. Ruta a Valle Hermoso” (4 km north of Vinchina on the right side of the road to valle Hermoso) and are therefore not usable. Fourteen published papers are found which gave local water table observations not affected by irrigation or pumping (reference 1-14).

### Bolivia

No government data was obtained despite repeated emails. One published article reported observations in the Bolivian Amazon (reference 15).

### Brazil

The Brazilian Geological Survey (<http://siagas.cprm.gov.br/wellshow/indice.asp?w=800>) has been the largest data source with observations at over 33,570 wells in unconfined aquifers. But unfortunately they are concentrated in the developed east and southeast and clustered over large metro regions (Fig. S1). The wells are drilled for groundwater exploitation; groundwater is cleaner and has become a major source

for municipal supply. About 95% of the wells in the dataset are reporting high pumping rates. Fig. S1 shows the principle aquifers and aquifer systems (color patches) and the metro regions in Amazonia situated on and are supplied by these large aquifers. Some of the aquifers in the east have seen regional water table decline of over 20 m in recent years. This poses a problem when we use the pumping-affected observations to validate model simulation of natural hydrologic conditions, as discussed in detail later. Fourteen published papers are also found with water table observations (reference 15, 16-28).

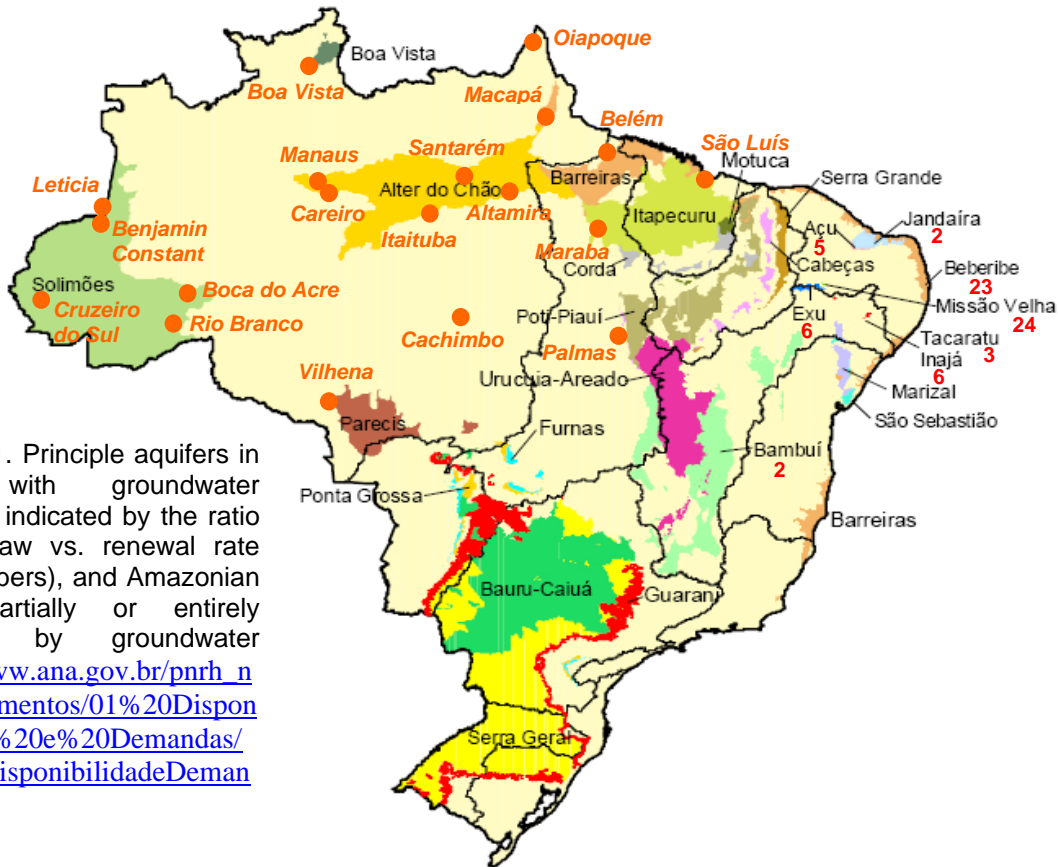

Figure S1. Principle aquifers in Brazil with groundwater depletion indicated by the ratio of withdraw vs. renewal rate (red numbers), and Amazonian cities partially or entirely supplied by groundwater ([http://www.ana.gov.br/pnrh\\_novo/documentos/01%20Disponibilidade%20e%20Demandas/VF%20DisponibilidadeDemanda.pdf](http://www.ana.gov.br/pnrh_novo/documentos/01%20Disponibilidade%20e%20Demandas/VF%20DisponibilidadeDemanda.pdf)).

Chile

WTD time series over 9 years are found for 30 wells maintained by Chilean Direcccion General de Aguas (<http://www.dga.cl/index.php?option=content&task=category&sectionid=16&id=43&Itemid=169>), with one published paper found with observations (reference 29).

Colombia

Repeated email requests were made. One publication has 1 observation in the country (reference 15).

Ecuador

The Instituto Nacional de Meteorología e Hidrologia of Ecuador provides an inventory list of 3,589 wells and springs (<http://www.inamhi.gov.ec/html/inicio.htm>) but actual water level is published for the Rio Mira basin only (146 sites). Observations at 5 sites are reported in a published literature (reference 15).

## Peru

The Insituto Nacional de Recursos Naturales of Peru provides reports of hydrogeologic investigation (17 reports at [http://www.inrena.gob.pe/irh/irh\\_est\\_hidrogeologicos.htm](http://www.inrena.gob.pe/irh/irh_est_hidrogeologicos.htm), and 29 reports at [http://www.inrena.gob.pe/irh/irh\\_proy\\_asubterraneas\\_act.htm](http://www.inrena.gob.pe/irh/irh_proy_asubterraneas_act.htm)) but they do not give information on the location of the thousands of wells, except for the valley of Ica which has a separate inventory report (bottom of [http://www.inrena.gob.pe/irh/irh\\_proy\\_asubterraneas.htm](http://www.inrena.gob.pe/irh/irh_proy_asubterraneas.htm)) yielding 66 site observations. We emailed and telephoned the contact given on the website and were assured many months ago that an expert will get back to us. The report of Iquitos includes a map of the wells, which is gridded into 128 cells of 300m by 300m and the mean in each cell is averaged. The report of Motupe includes a map of cities after which groundwater zones are named and water table range given, yielding 13 points. The same method is used to obtain 16 points from the La Leche report and 2 points from the Pucallpa report. Observations at 4 sites in the Peruvian Amazon are found in one published literature (reference 15).

## Suriname

A Ph.D. thesis provided detailed studies of the rainforest climate, geology, hydrology and ecology (reference 30).

## Venezuela

No government data were found despite phone calls and emails. Two published journal articles are found with study sites in southern Venezuela (reference 31-32).

## References

### Argentina

1. Cantero, J.J., Leon, R., Cisneros, J.M., and Cantero, A.: Habitat structure and vegetation relationships in central Argentina salt marsh landscapes. *Plant Ecology* 137, 79-100, 1998.
2. Carol, E., Kruse, E., and Pousa, J.: Environmental hydrogeology of the southern sector of the Samborombon Bay wetland, Argentina. *Environ. Geol.* 54, 95-102, 2008.
3. Engel, V., Jobbagy, E.G., Stieglitz, M., Willians, M. and Jackson, R.B.: Hydrologic consequences of Eucalyptus afforestation in the Argentine Pampas: *Water Resources Res.* 41, W10409, 2005.
4. Garcia, M.G., Hidalgo, M.d.V., and Blesa, M.A.: Geochemistry of groundwater in the alluvial plain of Tucuman Province, Argentina. *Hydrogeology J.* 9, 597-610, 2001.
5. Kruse, E., and Ainchil, J.: Fluoride variations in groundwater of an area in Buenos Aires Province, Argentina. *Environ. Geol.* 44, 86-89, 2003.
6. Londono, O.M.Q., Martinez, D.E., Dapena, C., and Massone, H.: Hydrogeochemistry and isotope analyses used to determine groundwater recharge and flow in low-gradient catchments of the province of Buenos Aires, Argentina. *Hydrogeology J.* 16, 1113-1127, 2008.
7. Martinez, S.E., and Carrillo-Rivera, J.J.: Socio-economic constraints of groundwater in Capital La Rioja, Argentina. *Environ. Geol.* 49, 875-886, 2006.
8. Osella, A., Favette, A., Martinelli, P., and Cernadas, D. : Electrical imaging of an alluvial aquifer at the Antinaco-Los Colorados tectonic valley in the Sierras Pampeanas, Argentina. *J. Appl. Geophysics* 41, 359-368, 1999.
9. Rodriguez, L.B., Cello, P.A., and Vionnet, C.A.: Modeling stream-aquifer interactions in a shallow aquifer, Choele Choel Island, Patagonia, Argentina. *Hydrogeology J.* 14, 591-602, 2006.
10. Sainato, C., Galindo, G., Pomposiello, C., Malleville, H., de Abelleira, D., and Losinno, B.: Electrical conductivity and depth of groundwater at the Pergamino zone (Buenos Aires Province, Argentina) through vertical electrical soundings and geostatistical analysis. *J. S. American Earth Sci.* 16, 177-186, 2003.
11. Schulze, E.D., Mooney, H.A., Sala, O.E., Jobbagy, E., Buchmann, N., Bauer, G., Canadell, J., Jackson, R.B., Loreti, J., Oesterheld, M., and Ehleringer, J.R.: Rooting depth, water availability, and vegetation cover along an aridity gradient in Patagonia. *Oecologia* 108, 503-511, 1996.
12. Smedley, P.L., Nicolli, B., Macdonald, D.M.J., Barros, A.J., and Tullio, J.O.: Hydrogeochemistry of arsenic and other inorganic constituents in groundwaters from La Pampa, Argentina. *Appl. Geochem.* 17, 259-284, 2002.
13. Taboada, M.A., Lavado, R.S., Rubio, G., and Cosentino, D.J.: Soil volumetric changes in natric soils caused by air entrapment following seasonal ponding and water table rise. *Geoderma* 101, 49-64, 2001.

14. Villagra, P.E., Villalba, R., and Boninsegna, J.A.: Structure and growth rate of *Prosopis flexuosa* woodlands in two contrasting environments of the central Monte desert. *J. Arid Env.* 60, 187-199, 2005.

#### Bolivia

15. Costa, M.H., Oliveira, C.H.C., Andrade, R.G., Bustamante, T.R., and Silva, F.A.: A macroscale hydrological data set of river flow routing parameters for the Amazon Basin. *J. Geophys. Res.* 107, D20,8039, 2002.

#### Brazil

16. Almeida, A.C., Soares, J.V., Landsberg, J.J., and Rezende, G.D.: Growth and water balance of *Eucalyptus grandis* hybrid plantations in Brazil during a rotation for pulp production. *Forest Ecol. Manag.* 251, 10-21, 2007.
17. Babu, D.S.S., Sahai, A.K., Noernberg M.A., and Marone E.: Hydraulic response of a tidally forced coastal aquifer, Pontal do Parana, Brazil. *Hydrogeology J.* 16, 1427-1439, 2008.
18. Bertolo, R., Hirata, R., and Sracek O.: Geochemistry and geochemical modeling of unsaturated zone in a tropical region in Urania, Sao Paulo state, Brazil. *J. Hydrol.* 329, 49-62, 2006.
19. Borma, L.S., da Rocha, H. R., Cabral, O. M., von Randow, C., Collicchio, E., Kuratowski, D., Brugger, P. J., Freitas, H., Tannus, R., Oliveira, L., Renno, C. D., and Artaxo, P.: Atmosphere and hydrologic controls of the evapotranspiration over a floodplain forest in the Bananal Island region, Amazonia. *Journal of Geophysical Research* 114, G01003, 2009.
20. Carbo L., Souza V., Dores E.F.G.C., and Ribeiro M.L.: Determination of pesticides multiresidues in shallow groundwater in a cotton-growing region of Mato Grosso, Brazil. *J. Braz. Chem. So.* 19, 1111-1117, 2008.
21. Cuartas, L. A.: Estudo Observacional E De Modelagem Hidrologica De Uma Micro-Bacia Em Floresta Nao Perturbada Na Amazonia Central. Ph.D. Thesis, Instituto Nacional de Pesquisas Espaciais, Sao Jose dos Campos, 2008.  
([http://biblioteca.universia.net/html\\_bura/ficha/params/id/51038000.html](http://biblioteca.universia.net/html_bura/ficha/params/id/51038000.html)).
22. Garcia-Montiel, D.C., Coe, M.T., Cruz, M.P., Ferreira, J.N., and da Silva, E.M.: Estimating seasonal changes in volumetric soil water content at landscape scales in a savanna ecosystem using two-dimensional resistivity profiling. *Earth Interactions* 12, 1-25, 2008.
23. Grogan, J., and Galvao, J.: Physiographic and floristic gradients across topography in transitional seasonally dry evergreen forests of southeast Para, Brazil. *Acta Amazonica*, 36, 483-496, 2006.
24. Jirka, S., McDonald, A.J., Johnson, M.S., Feldpausch, T.R., Couto, E.G., and Riha, S.J.: Relationships between soil hydrology and forest structure and composition in the southern Brazilian Amazon. *J. Vegetation Sci.* 18, 183-197, 2007.
25. Kreibich, H., and Kern, J.: Nitrogen fixation and denitrification in a floodplain forest near Manaus, Brazil. *Hydrol. Processes* 17: 1431-1441, 2003.

26. de Moraes, Schuler, A.E., Dunne, T., Figueiredo, R.D.O., and Victoria, R.L.: Water storage and runoff processes in plinthic soils under forest and pasture in eastern Amazonia. *Hydrol. Processes* 20, 2509-2526, 2006.
27. Selhorst, D., Vieira, S. A., and Brown, I. F.: Água e crescimento de uma floresta na Amazônia Sul-Occidental, Acre, Brasil: chuva afeta crescimento, mas nível do lençol freático não. Poster presentation, 2002.  
([ftp://lba.cptec.inpe.br/lba\\_archives/LC/LC-02/Posters/SelhorstDiogo\\_Poster\\_VI\\_CEB\\_02nov03.pdf](ftp://lba.cptec.inpe.br/lba_archives/LC/LC-02/Posters/SelhorstDiogo_Poster_VI_CEB_02nov03.pdf))
28. Vourlitis, G. L., Nogueira, J. D., Lobo, F. D., Sendall, K. M., de Paulo, S. R., Dias, C. A. A., Pinto Jr., O. B., and de Andrade, N. L. R.: Energy balance and canopy conductance of a tropical semi-deciduous forest of the southern Amazon Basin. *Water Resources Research* 44, W03412, 2008.

#### Chile

29. Squeo, F.A., Aravena, R., Aguirre, E., Pollastri, A., Jorquera, C.B., and Ehleringer, J.R.: Groundwater dynamics in a coastal aquifer in north-central Chile: Implications for groundwater recharge in an arid ecosystem. *J. Arid Env.* 67, 240-254, 2006.

#### Suriname

30. Poels, R. L. H.: Soils, Water and Nutrients in a Forest Ecosystem in Suriname, Agr. Univ., Wageningen, The Netherlands, 1987.

#### Venezuela

31. Bongers F., Engelen D., and Klinge H.: Phytomass structure of natural plant communities on spodosols in southern Venezuela: the Bana woodland. *Vegetatio* 63, 13-34, 1985.
32. Coomes D.A., and Grubb P.J.: Amazonian caatinga and related communities at La Esmeralda, Venezuela: forest structure, physiognomy and floristics, and control by soil factors. *Vegetatio* 122, 167-191, 1996.
